# Supplementary material
Source: PubMed Central journal article supplement (PMC3326280)
Supplement: msy-0002-0081-s01.pdf [file msy-0002-0081-s01.pdf]

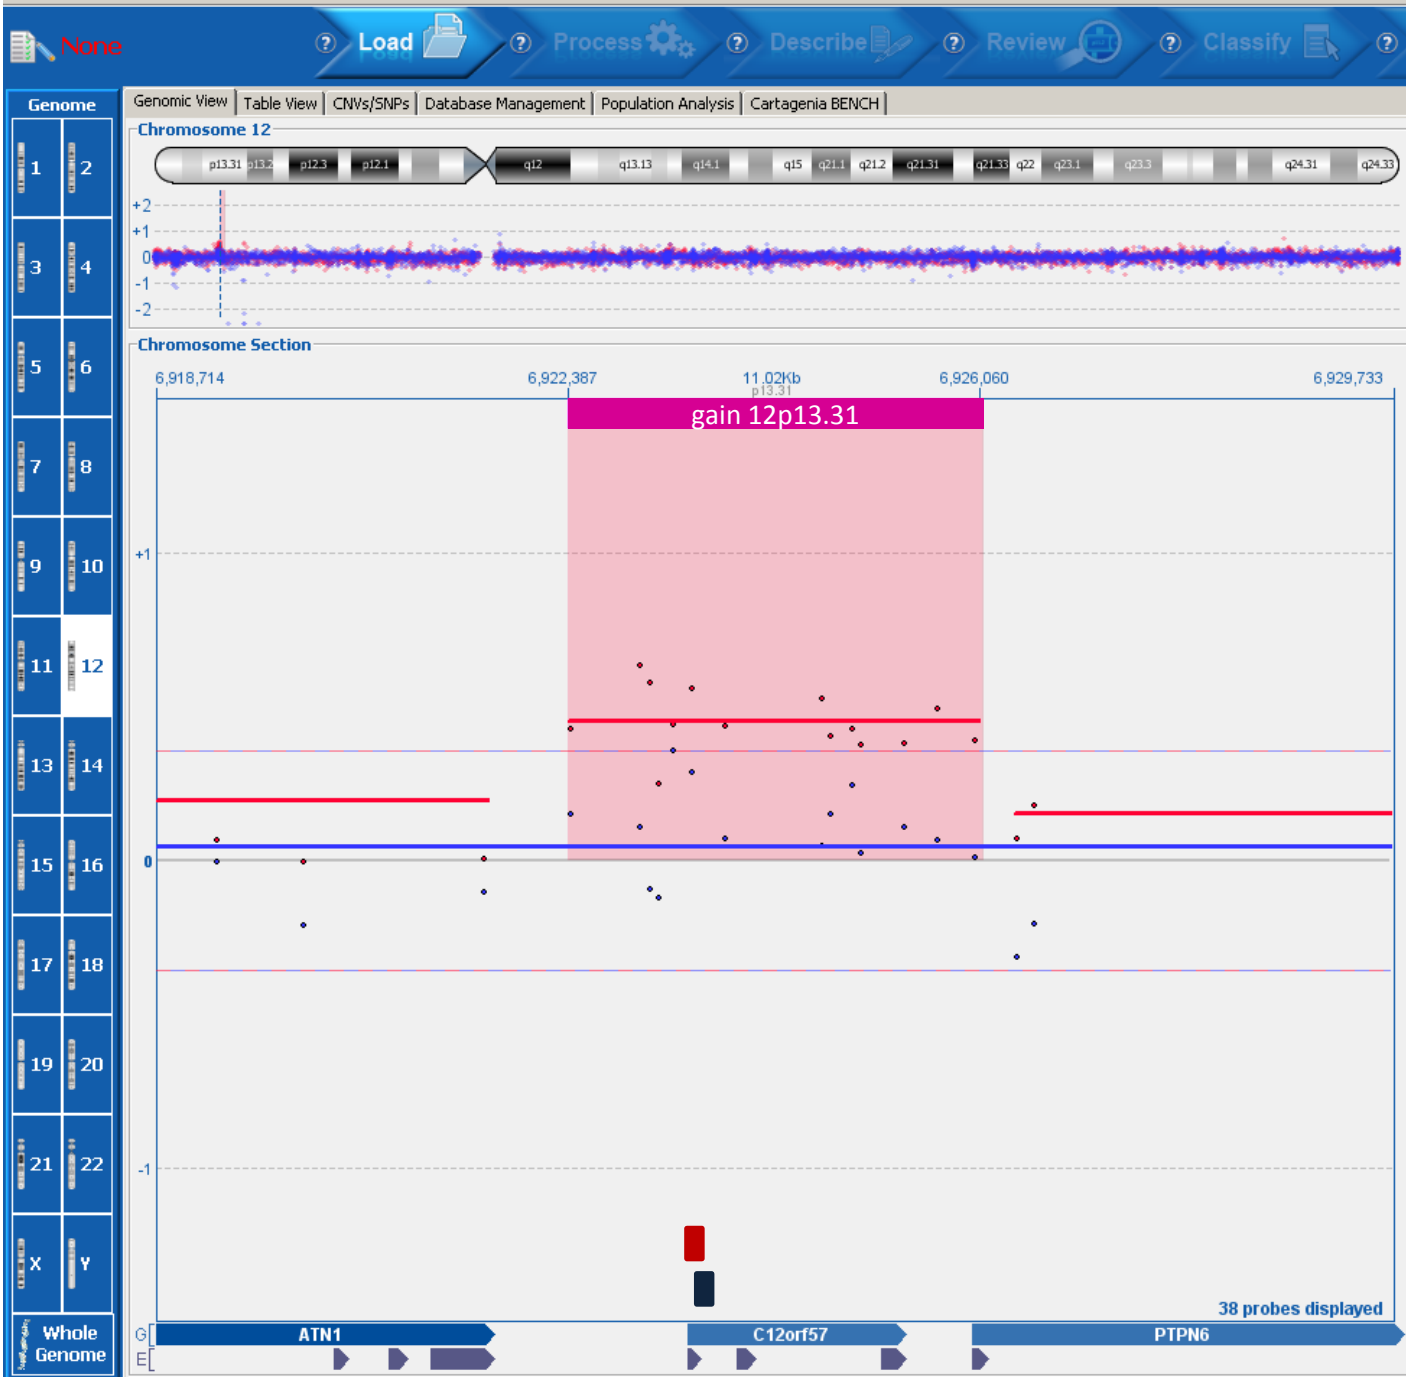**CNV profiles:**

- affected twin
- unaffected twin

**PCR sequence:**

- chr12:6,923,603-6,923,709
- chr12:6,923,590-6,923,656

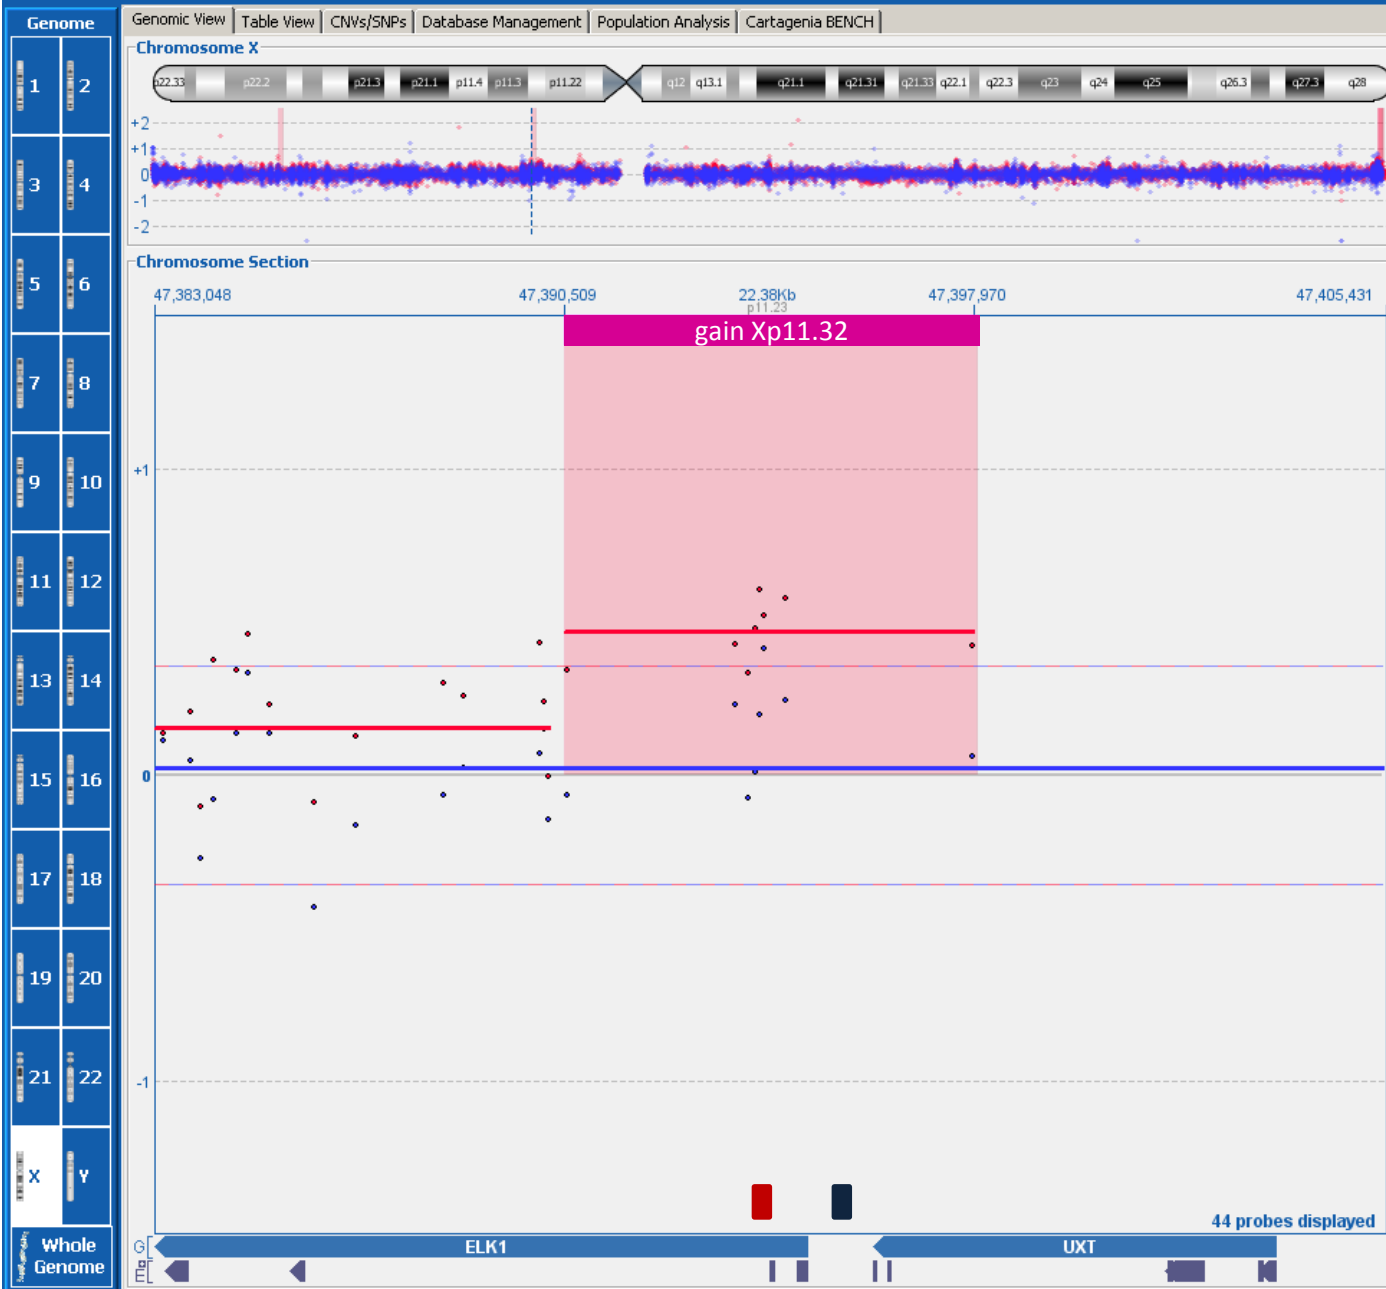

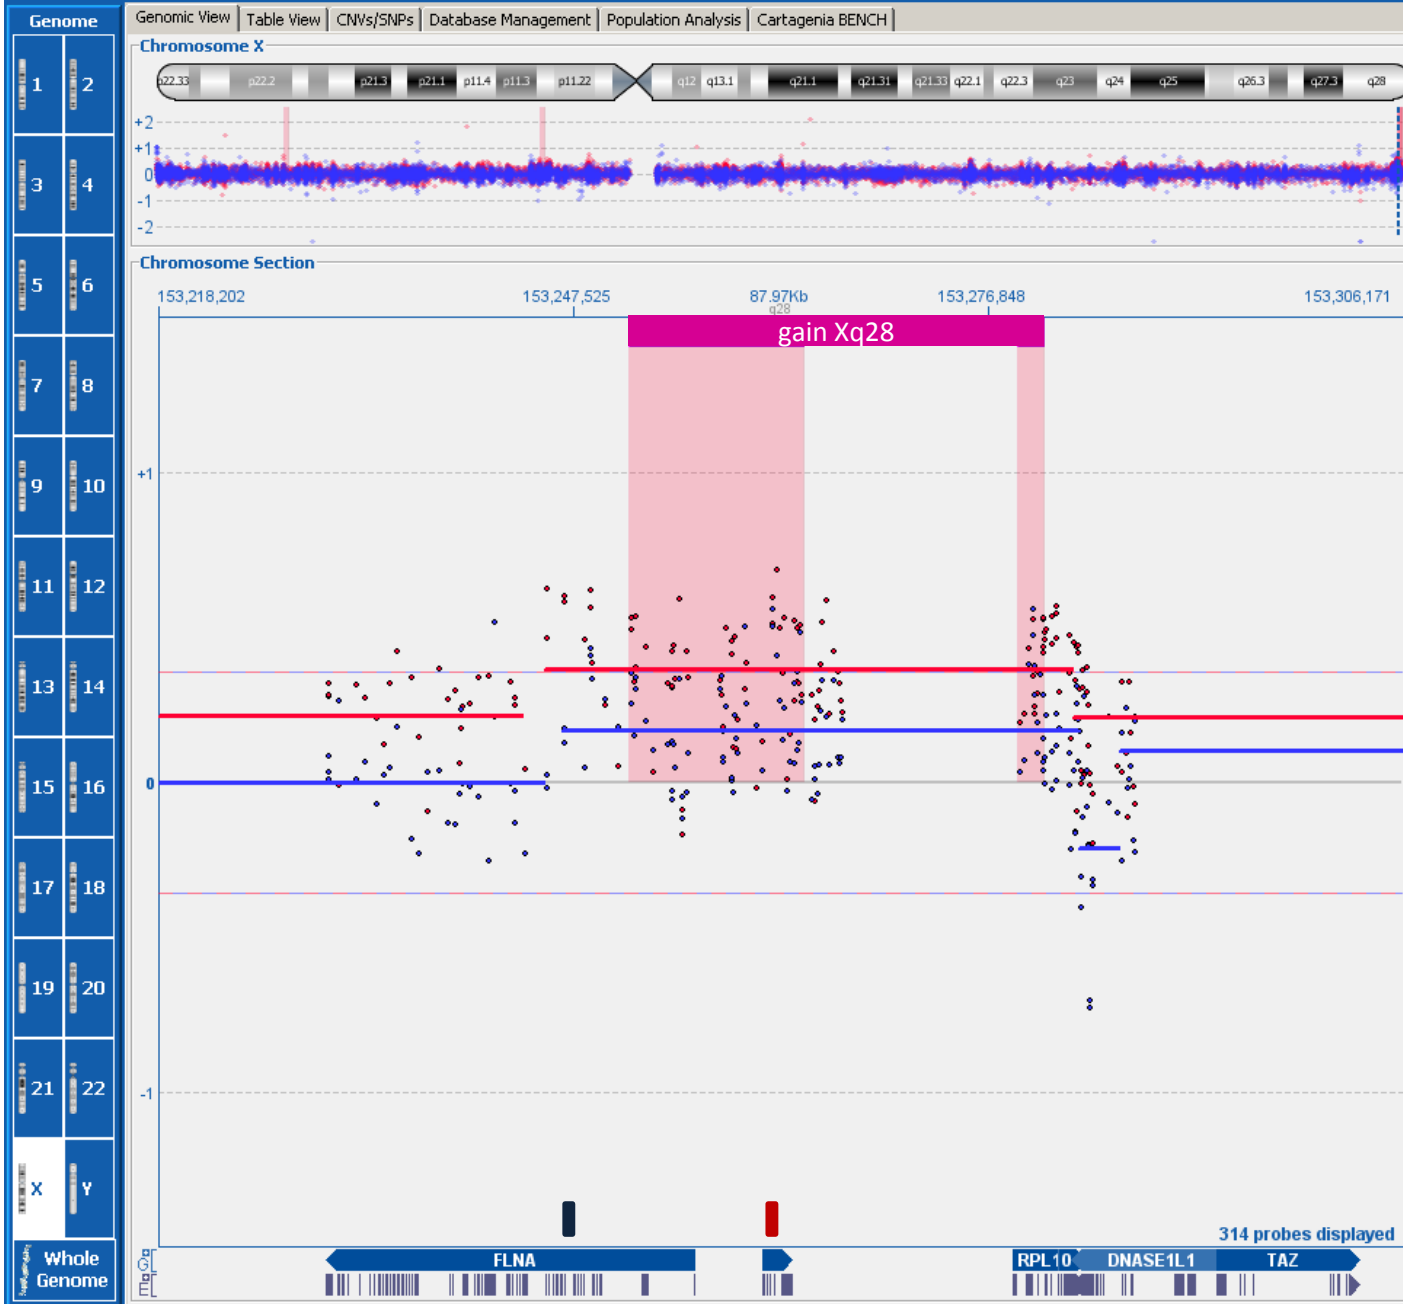

## CNV profiles:

- affected twin
- unaffected twin

## PCR sequence:

- chrX:153,246,201-153,246,291
- chrX:153,262,146-153,262,222
